# Supplementary material for: Structural refinement of the RT LaOF phases by coupling powder X-Ray diffraction,19F and139La solid state NMR and DFT calculations of the NMR parameters
Source: Royal Society of Chemistry journal article supplement (doi:10.1039/c5dt04028k), 2015-01-01
Supplement: c5dt04028k1.pdf [file c5dt04028k1.pdf]

# Structural refinement of the RT LaOF phases by coupling powder X-Ray diffraction, $^{19}\text{F}$ and $^{139}\text{La}$ solid state NMR and DFT calculations of the NMR parameters

Jamal Dabachi, Monique Body, Jens Dittmer, Franck Fayon, and Christophe Legein

## Electronic Supporting Information

### Table of contents

|                                                                                                                                          |    |
|------------------------------------------------------------------------------------------------------------------------------------------|----|
| 1. Homogeneity ranges of t- and $\beta$ -LaOF.....                                                                                       | 2  |
| 2. Structural data.....                                                                                                                  | 3  |
| 2.1. $\beta$ -LaOF (rhomboedral).....                                                                                                    | 3  |
| 2.2. t-LaOF (tetragonal).....                                                                                                            | 5  |
| 3. Bond valence calculations.....                                                                                                        | 8  |
| 4. DFT optimizations of the Zachariasen structures.....                                                                                  | 9  |
| 4.1 $\beta$ -LaOF.....                                                                                                                   | 9  |
| 4.2 t-LaOF.....                                                                                                                          | 9  |
| 5. Parameters used to generate the OTF USPP pseudopotentials.....                                                                        | 9  |
| 6. F-F, F-O and O-O distances for $\beta$ - and t-LaOF from the Rietveld refinement and after DFT-PBE atomic position optimization ..... | 10 |
| 7. Eigenvectors of the calculated $^{139}\text{La}$ EFG tensor.....                                                                      | 10 |
| References.....                                                                                                                          | 11 |

## 1. Homogeneity ranges of t- and $\beta$ -LaOF

According to Zachariassen<sup>1</sup> the tetragonal phase has a wide homogeneity range, extending from  $\text{LaO}_{0.7}\text{F}_{1.6}$  to LaOF, and is stabilized by the presence of excess fluorine, located in interstitial position, over the ideal composition LaOF. For this ideal composition the tetragonal phase is unstable relative to the rhombohedral phase. The unit-cell dimensions of the tetragonal phases decrease with increasing oxygen content. On the other hand, the chemical composition of the rhombohedral phase is sharply defined and corresponds to the exact formula LaOF. No variation in unit-cell dimensions of this phase is observed. Only Tyagi<sup>2</sup> suggested that the tetragonal form of stoichiometric LaOF is more stable than the rhombohedral form of LaOF but the reported values of x in  $\text{LaO}_{1-x}\text{F}_{1+2x}$  are not consistent with the corresponding compositions (see 2.1.e). The recalculated values of x allow contradicting this suggestion.<sup>3</sup> On the other hand, the tetragonal phase has a wider homogeneity range extending from  $\text{LaO}_{0.263}\text{F}_{2.474}$  to LaOF (see 2.2.c) and the rhombohedral phase does not correspond only to the exact formula LaOF but presents also an homogeneity range extending from  $\text{LaO}_{1.008}\text{F}_{0.984}$  to  $\text{LaO}_{1.106}\text{F}_{0.788}$  (see 2.1.e).<sup>3</sup> However, as previously outlined by Fergus and Chen,<sup>4</sup> who determine a maximum value of x equal to 0.43 (see 2.2.d), the maximum value of x for the tetragonal phase was based, by Tyagi,<sup>2</sup> on the appearance of (diffraction) peaks for  $\text{LaF}_3$  which may not be observable in two-phase materials containing small amounts of  $\text{LaF}_3$ .

## 2. Structural data

### 2.1. $\beta$ -LaOF (rhomboedral)

#### 2.1.a) ICSD<sup>5</sup> 30622<sup>1</sup>

Space group: R -3 m R (166)

$a = 7.132(1) \text{ \AA}$ ,  $\alpha = 33.01(1)^\circ$ , cell volume =  $95.82 \text{ \AA}^3$ ,  $Z = 2$

Fractional atomic coordinates:

| Atom | Wyck. | x        | y        | z        |
|------|-------|----------|----------|----------|
| La1  | 2 c   | 0.242(1) | 0.242(1) | 0.242(1) |
| F1   | 2 c   | 0.122    | 0.122    | 0.122    |
| O1   | 2 c   | 0.37     | 0.37     | 0.37     |

Interatomic distances ( $\text{\AA}$ ):

|     |    |    |        |
|-----|----|----|--------|
| La1 | F1 | 3x | 2.4204 |
|     | F1 | 1x | 2.4254 |
|     | O1 | 1x | 2.5871 |
|     | O1 | 3x | 2.5874 |

Hexagonal cell:  $a = 4.0524 \text{ \AA}$ ,  $c = 20.2120 \text{ \AA}$

Fractional atomic coordinates:

| Atom | Wyck. | x | y | z     |
|------|-------|---|---|-------|
| La1  | 6c    | 0 | 0 | 0.242 |
| F1   | 6c    | 0 | 0 | 0.122 |
| O1   | 6c    | 0 | 0 | 0.37  |

#### 2.1.b) from ref.<sup>6</sup>

$a = 7.132(1) \text{ \AA}$ ,  $\alpha = 32.99(1)^\circ$

#### 2.1.c) from ref.<sup>7,8</sup>

Later, the crystal structure of  $\beta$ -LaOF was also refined by Hölsä *et al.*<sup>7,8</sup> leading to the same conclusions (*i.e.* that the oxygen and fluorine atom positions should be interchanged).

Hexagonal cell:  $a = 4.0534(1) \text{ \AA}$ ,  $c = 20.1961(1) \text{ \AA}$ <sup>7</sup>

Fractional atomic coordinates:

| Atom | Wyck. | x | y | z         |
|------|-------|---|---|-----------|
| La1  | 6c    | 0 | 0 | 0.2425(1) |
| F1   | 6c    | 0 | 0 | 0.3707(7) |
| O1   | 6c    | 0 | 0 | 0.1190(9) |

Interatomic distances ( $\text{\AA}$ ):

|     |    |    |             |
|-----|----|----|-------------|
| La1 | O1 | 3x | 2.4084(43)  |
|     | O1 | 1x | 2.4942(183) |
|     | F1 | 3x | 2.5773(60)  |
|     | F1 | 1x | 2.5891(143) |

Hexagonal cell:  $a = 4.0534(4) \text{ \AA}$ ,  $c = 20.1961(10) \text{ \AA}$ <sup>8</sup>

Fractional atomic coordinates:

| Atom | Wyck. | x | y | z          |
|------|-------|---|---|------------|
| La1  | 6c    | 0 | 0 | 0.24249(1) |
| F1   | 6c    | 0 | 0 | 0.37068(6) |
| O1   | 6c    | 0 | 0 | 0.11902(7) |

Interatomic distances ( $\text{\AA}$ ):

|     |    |    |            |
|-----|----|----|------------|
| La1 | O1 | 3x | 2.4084(4)  |
|     | O1 | 1x | 2.4936(14) |
|     | F1 | 3x | 2.5776(6)  |
|     | F1 | 1x | 2.5889(12) |

### 2.1.d) from ref.<sup>9</sup>

Hexagonal cell:  $a = 4.0505(2) \text{ \AA}$ ,  $c = 20.2115(25) \text{ \AA}$  and  $a = 4.051 \text{ \AA}$ ,  $c = 20.22 \text{ \AA}$ .

### 2.1.e) from ref.<sup>2</sup>

Cell parameters of  $\text{LaO}_{1-x}\text{F}_{1+2x}$  with  $-0.235 \leq x \leq -0.160$ , recalculated as  $-0.106 \leq x \leq -0.008$  in ref.<sup>3</sup>

|                                      | $a \text{ (\AA)}$ | $\alpha \text{ (}^\circ\text{)}$ |
|--------------------------------------|-------------------|----------------------------------|
| $\text{LaO}_{1.008}\text{F}_{0.984}$ | 7.060(9)          | 33.48                            |
| $\text{LaO}_{1.022}\text{F}_{0.956}$ | 7.059(9)          | 33.50                            |
| $\text{LaO}_{1.036}\text{F}_{0.928}$ | 7.057(9)          | 33.50                            |
| $\text{LaO}_{1.106}\text{F}_{0.788}$ | 7.052(8)          | 33.67                            |

### 2.1.f) from ref.<sup>10</sup>

Hexagonal cell :  $a = 4.056(5) \text{ \AA}$ ,  $c = 20.21(3) \text{ \AA}$ .

### 2.1.g) from ref.<sup>4</sup>

$a = 7.1290 \text{ \AA}$ ,  $\alpha = 33.01^\circ$ , same atomic positions as Zachariassen.<sup>1</sup>

Hexagonal cell:  $a = 4.0512 \text{ \AA}$ ,  $c = 20.2031 \text{ \AA}$ .

### 2.1.h) from ref.<sup>11</sup>

$\text{LaO}_{1-x}\text{F}_{1+2x}$  with  $-0.01 \leq x \leq 0.02$

$a = 7.133 \text{ \AA}$ ,  $\alpha = 33.0^\circ$ .

### 2.1.i) from ref.<sup>12</sup>

Hexagonal cell:  $a=4.056(9) \text{ \AA}$ ,  $c=20.227(1) \text{ \AA}$ .

### 2.1.j) from ref.<sup>13</sup>

Hexagonal cell:  $a=4.0516(2) \text{ \AA}$ ,  $c=20.177(3) \text{ \AA}$ .

### 2.1.k) from ref.<sup>14</sup>

Hexagonal cell:  $a=4.044(8) \text{ \AA}$ ,  $c=20.141(8) \text{ \AA}$ .

## 2.2. t-LaOF (tetragonal)

### 2.2.a) from ref.<sup>1</sup>

Space group: P 4/n m m (129)

#### LaOF (ICSD<sup>5</sup> 76427)

a = 4.091(1) Å, c = 5.836(1) Å, cell volume = 97.67 Å<sup>3</sup>, Z = 2

Fractional atomic coordinates:

| Atom | Wyck. | x   | y | z        |
|------|-------|-----|---|----------|
| La1  | 2c    | 0.5 | 0 | 0.222(4) |
| F1   | 2a    | 0   | 0 | 0        |
| O1   | 2b    | 0   | 0 | 0.5      |

Interatomic distances (Å):

|     |    |    |        |
|-----|----|----|--------|
| La1 | F1 | 4x | 2.4213 |
|     | O1 | 4x | 2.6108 |

#### LaF<sub>1.6</sub>O<sub>0.7</sub>

Zachariasen has also reported the positions for the interstitial anions in the tetragonal anion-excess phase LaF<sub>1.6</sub>O<sub>0.7</sub>.<sup>1</sup>

a = 4.106(2) Å, c = 5.852(4) Å

Fractional atomic coordinates:

| Atom | Wyck. | S.O.F. | x   | y | z     |
|------|-------|--------|-----|---|-------|
| La1  | 2c    | 1      | 0.5 | 0 | 0.235 |
| F1   | 2a    | 1      | 0   | 0 | 0     |
| O    | 2b    | 0.7    | 0   | 0 | 0.5   |
| F    | 2b    | 0.3    | 0   | 0 | 0.5   |
| ∅F   | 2c    | 0.3    | 0.5 | 0 | 0.75  |

### 2.2.b) from ref.<sup>8</sup>

Hölsä *et al.* have also refined the crystal structures of the tetragonal form (with  $z_{La} > 0.25$  and then distances La-F > La-O) for various t-LaO<sub>1-x</sub>F<sub>1+2x</sub> ( $0.05 \leq x \leq 0.30$ ) but without considering the expected interstitial positions occupied by the excess F<sup>-</sup> ions. In addition, the evolutions with x of the unit cell parameters are not regular making doubtful the compositions of these non-stoichiometric phases.

Cell parameters a (Å) and c (Å),  $z_{La}$  and interatomic distances (Å):

|                                       | a         | c         | $z_{La}$   | La-O distance | La-F distance <sup>a</sup> |
|---------------------------------------|-----------|-----------|------------|---------------|----------------------------|
| LaO <sub>0.95</sub> F <sub>1.10</sub> | 4.0850(4) | 5.8320(7) | 0.27592(4) | 2.425(4)      | 2.600(4)                   |
| LaO <sub>0.91</sub> F <sub>1.18</sub> | 4.0906(2) | 5.8386(4) | 0.27991(3) | 2.415(4)      | 2.618(4)                   |
| LaO <sub>0.89</sub> F <sub>1.22</sub> | 4.0942(2) | 5.8423(3) | 0.28057(3) | 2.415(4)      | 2.623(4)                   |
| LaO <sub>0.85</sub> F <sub>1.30</sub> | 4.0927(1) | 5.8386(2) | 0.27887(3) | 2.419(4)      | 2.615(4)                   |
| LaO <sub>0.83</sub> F <sub>1.34</sub> | 4.1202(2) | 5.8765(4) | 0.27998(4) | 2.432(4)      | 2.637(4)                   |
| LaO <sub>0.72</sub> F <sub>1.56</sub> | 4.1089(1) | 5.8593(3) | 0.27520(4) | 2.440(4)      | 2.612(4)                   |
| LaO <sub>0.70</sub> F <sub>1.60</sub> | 4.1120(1) | 5.8599(4) | 0.27255(4) | 2.450(4)      | 2.603(4)                   |

<sup>a</sup> One La-F distance since the expected interstitial positions occupied by the excess F<sup>-</sup> ions were not considered

### 2.2.c) from ref.<sup>2</sup>

**LaO<sub>1-x</sub>F<sub>1+2x</sub> with -0.154 ≤ x ≤ 0.609 recalculated as -0.001 ≤ x ≤ 0.737 in ref.<sup>3</sup>**

The reported a' and c' parameters (Å) are reversed from those determined by Zachariassen<sup>1</sup> and Fergus *et al.*<sup>4</sup> and are then recalculated below for the sake of clarity.

|                                         | a' = c   | c' = a√2 | c'/√2 = a |
|-----------------------------------------|----------|----------|-----------|
| LaO <sub>1.001</sub> F <sub>0.998</sub> | 5.820(3) | 5.777(3) | 4.085     |
| LaO <sub>0.965</sub> F <sub>1.070</sub> | 5.821(2) | 5.770(2) | 4.080     |
| LaO <sub>0.893</sub> F <sub>1.214</sub> | 5.821(3) | 5.769(3) | 4.079     |
| LaO <sub>0.819</sub> F <sub>1.362</sub> | 5.822(2) | 5.767(3) | 4.078     |
| LaO <sub>0.744</sub> F <sub>1.512</sub> | 5.827(2) | 5.775(2) | 4.084     |
| LaO <sub>0.667</sub> F <sub>1.666</sub> | 5.830(4) | 5.783(2) | 4.089     |
| LaO <sub>0.590</sub> F <sub>1.820</sub> | 5.829(2) | 5.779(2) | 4.086     |
| LaO <sub>0.510</sub> F <sub>1.980</sub> | 5.837(2) | 5.777(2) | 4.085     |
| LaO <sub>0.429</sub> F <sub>2.142</sub> | 5.839(2) | 5.793(2) | 4.096     |
| LaO <sub>0.347</sub> F <sub>2.306</sub> | 5.840(5) | 5.793(7) | 4.096     |
| LaO <sub>0.263</sub> F <sub>2.474</sub> | 5.842(1) | 5.779(2) | 4.086     |

### 2.2.d) from ref.<sup>4</sup>

**LaO<sub>1-x</sub>F<sub>1+2x</sub>**

Cell parameters a (Å) and c (Å) and δ (zLa = 0.25 - δ/2):

|                                       | a (Å)  | c (Å)  | δ     |
|---------------------------------------|--------|--------|-------|
| LaOF                                  | 4.0834 | 5.8300 | 0.061 |
| LaOF                                  | 4.0804 | 5.8278 | 0.064 |
| LaO <sub>0.75</sub> F <sub>1.5</sub>  | 4.0916 | 5.8397 | 0.056 |
| LaO <sub>0.57</sub> F <sub>1.86</sub> | 4.0994 | 5.8451 | 0.045 |
| LaO <sub>0.57</sub> F <sub>1.86</sub> | 4.0993 | 5.8446 | 0.046 |

$$a (\text{Å}) = 4.0816 + 0.0044 x \quad (0 < x < 0.43); \quad c (\text{Å}) = 5.8288 + 0.0041 x \quad (0 < x < 0.43)$$

**LaOF (x=0)**

Fractional atomic coordinates:

| Atom | Wyck. | x   | y | z        |
|------|-------|-----|---|----------|
| La1  | 2 c   | 0.5 | 0 | 0.25-δ/2 |
| F1   | 2 a   | 0   | 0 | 0        |
| O1   | 2 b   | 0   | 0 | 0.5      |

**x>0**

Fergus and Chen<sup>4</sup> claimed that they follow the analysis of Zachariassen<sup>1</sup> but the occupation rates of the anion sites by oxide and excess fluoride ions differ.

Fractional atomic coordinates:

| Atom | Site | S.O.F. | x   | y | z        |
|------|------|--------|-----|---|----------|
| La1  | 2 c  | 1      | 0.5 | 0 | 0.25-δ/2 |
| F1   | 2 a  | 1      | 0   | 0 | 0        |
| O    | 2 c  | 1-2x   | 0.5 | 0 | 0.75     |
| F    | 2 c  | 2x     | 0.5 | 0 | 0.75     |
| O    | 2 b  | x      | 0   | 0 | 0.5      |

**2.2.e) from ref.<sup>12</sup>****LaOF**

a = 4.101(1) Å, c = 5.851(8) Å

**2.2.f) from ref.<sup>15</sup>****LaOF**

a = 4.096586 Å, c = 5.834422 Å

**2.2.g) from ref.<sup>14</sup>****LaOF**

a = 4.105(7) Å, c = 5.857(1) Å

**2.2.h) ICSD<sup>5</sup> 40371<sup>16</sup>**

In fact, before the two studies of Hölsa *et al.*<sup>8</sup> and Fergus and Chen,<sup>4</sup> the crystal structure of the tetragonal anion-excess phase  $\text{LaF}_{1.70}\text{O}_{0.65}$  was investigated by Laval *et al.* by means of neutron diffraction data. They show that O and F have to be reversed (F and O located at 2b and 2a sites, respectively) in both stoichiometric and anion-excess tetragonal phases. They also show that, in  $t\text{-LaF}_{1.70}\text{O}_{0.65}$ , the O/F order is preserved and that the excess of anions are accommodated by the creation of vacancies within the F-layers, the insertion of F atoms at interstitial site and the partial substitution of F atoms for O ones within the O-layers. The La-O distances (2.46 Å) are shorter than the La-F ones (2.58-2.60 Å).

**LaF<sub>1.7</sub>O<sub>0.65</sub>**

a=4.105(2) Å, c=5.843(3) Å

Fractional atomic coordinates [origin choice 2]:

| Atom | Site | S.O.F. | x   | y        | z         |
|------|------|--------|-----|----------|-----------|
| La1  | 2c   | 1      | 1/4 | 1/4      | 0.2314(3) |
| O1   | 2a   | 0.65   | 3/4 | 1/4      | 0         |
| F1   | 2a   | 0.35   | 3/4 | 1/4      | 0         |
| F2   | 2b   | 0.86   | 3/4 | 1/4      | 1/2       |
| F3   | 8i   | 0.1225 | 1/4 | 0.098(2) | 0.663(1)  |

Interatomic distances (Å):

|     |       |    |        |
|-----|-------|----|--------|
| La1 | O1 F1 | 4x | 2.4578 |
|     | F3    | 8x | 2.5757 |
|     | F2    | 4x | 2.5838 |
|     | F3    | 4x | 2.5979 |

### 3. Bond valence calculations

The valence,  $v_{ij}$ , of a bond between two atoms  $i$  and  $j$  is defined so that the sum of all the valences from a given atom  $i$  with valence  $V_i$  obeys:  $\sum_j v_{ij} = V_i$ . The most commonly adopted empirical expression for the variation of the length  $d_{ij}$  of a bond with valence is  $v_{ij} = \exp[(R_{ij} - d_{ij})/b]$  with  $b=0.37 \text{ \AA}^{-1}$  and  $R_{ij} = 2.172 \text{ \AA}$  and  $2.057 \text{ \AA}$  for La-O and La-F, respectively.<sup>17,18</sup>

**Table S1.** Bond valence calculations for tetragonal LaOF<sup>1</sup>

| Atom i | Atom j | CN | $d_{ij}$ (Å) | $v_{ij}$ | $V_i$ |
|--------|--------|----|--------------|----------|-------|
| La1    | F1     | 4  | 2.4213       | 0.374    | 2.72  |
|        | O1     | 4  | 2.6108       | 0.305    |       |
| F1     | La1    | 4  | 2.4213       | 0.374    | 1.49  |
| O1     | La1    | 4  | 2.6108       | 0.305    | 1.22  |

**Table S2.** Bond valence calculations for tetragonal LaOF<sup>1</sup> with oxygen and fluorine atom positions interchanged

| Atom i | Atom j | CN | $d_{ij}$ (Å) | $v_{ij}$ | $V_i$ |
|--------|--------|----|--------------|----------|-------|
| La1    | O1     | 4  | 2.4213       | 0.510    | 2.93  |
|        | F1     | 4  | 2.6108       | 0.224    |       |
| O1     | La1    | 4  | 2.4213       | 0.510    | 2.04  |
| F1     | La1    | 4  | 2.6108       | 0.224    | 0.90  |

**Table S3.** Bond valence calculations for rhombohedral LaOF<sup>1</sup>

| Atom i | Atom j | CN | $d_{ij}$ (Å) | $v_{ij}$ | $V_i$ |
|--------|--------|----|--------------|----------|-------|
| La1    | F1     | 3  | 2.4204       | 0.375    | 2.79  |
|        | F1     | 1  | 2.4254       | 0.369    |       |
|        | O1     | 1  | 2.5871       | 0.326    |       |
|        | O1     | 3  | 2.5874       | 0.325    |       |
| F1     | La1    | 3  | 2.4204       | 0.375    | 1.49  |
|        | La1    | 1  | 2.4254       | 0.369    |       |
| O1     | La1    | 1  | 2.5871       | 0.326    | 1.30  |
|        | La1    | 3  | 2.5874       | 0.325    |       |

**Table S4.** Bond valence calculations for rhombohedral LaOF<sup>1</sup> with oxygen and fluorine atom positions interchanged

| Atom i | Atom j | CN | $d_{ij}$ (Å) | $v_{ij}$ | $V_i$ |
|--------|--------|----|--------------|----------|-------|
| La1    | O1     | 3  | 2.4204       | 0.511    | 2.99  |
|        | O1     | 1  | 2.4254       | 0.504    |       |
|        | F1     | 1  | 2.5871       | 0.239    |       |
|        | F1     | 3  | 2.5874       | 0.238    |       |
| O1     | La1    | 3  | 2.4204       | 0.511    | 2.04  |
|        | La1    | 1  | 2.4254       | 0.504    |       |
| F1     | La1    | 1  | 2.5871       | 0.239    | 0.95  |
|        | La1    | 3  | 2.5874       | 0.238    |       |



## 4. DFT optimizations of the Zachariasen structures

### 4.1 $\beta$ -LaOF

Hexagonal cell:  $a = 4.0524 \text{ \AA}$ ,  $c = 20.2120 \text{ \AA}$

Fractional atomic coordinates after optimization:

| Atom | Wyck. | x | y | z      |
|------|-------|---|---|--------|
| La1  | 6c    | 0 | 0 | 0.2586 |
| F1   | 6c    | 0 | 0 | 0.1286 |
| O1   | 6c    | 0 | 0 | 0.3770 |

### 4.2 t-LaOF

$a = 4.091(1) \text{ \AA}$ ,  $c = 5.836(1) \text{ \AA}$

Fractional atomic coordinates after optimization:

| Atom | Wyck. | x   | y | z      |
|------|-------|-----|---|--------|
| La1  | 2c    | 0.5 | 0 | 0.2854 |
| F1   | 2a    | 0   | 0 | 0      |
| O1   | 2b    | 0   | 0 | 0.5    |

## 5. Parameters used to generate the OTF USPP pseudopotentials

Details on the string can be found on the Castep website (<http://www.castep.org/>) in the documentation section.

---

| Atom | OTF USPP String                                                                               |
|------|-----------------------------------------------------------------------------------------------|
| O    | 2 1.3 16.537 18.375 20.212 20UU:21UU(qc=7.5)[]                                                |
| F    | 2 1.4 16.537 18.375 20.212 20UU:21UU(qc=7.5)[]                                                |
| La   | 2 2 2 1.4 8 12 13 50N:60NH:51UU:52LGG:<br>43U1.6+0@0.1672U1.6+0.1@0.1672{5d0.9,4f0.1}{qc=6}[] |

---

## 6. F-F, F-O and O-O distances for $\beta$ - and t-LaOF from the Rietveld refinement and after DFT-PBE atomic position optimization

**Table S5** F-F, F-O and O-O distances (Å) for  $\beta$ - and t-LaOF from the Rietveld refinement (experimental structure, ES) and after DFT-PBE atomic position optimization (APO). Uncertainties are indicated in brackets. For t-LaOF, the O and F atomic coordinates are fixed by symmetry.

| Phase         | Distances          | ES        | APO    |
|---------------|--------------------|-----------|--------|
| $\beta$ -LaOF | F-F ( $\times 3$ ) | 2.768(9)  | 2.770  |
|               | F-O ( $\times 3$ ) | 2.912(11) | 2.911  |
|               | O-O ( $\times 3$ ) | 2.949(12) | 2.949  |
| t-LaOF        | F-F ( $\times 4$ ) | 2.8883(1) | 2.8883 |
|               | O-O ( $\times 4$ ) | 2.8883(1) | 2.8883 |
|               | F-O ( $\times 2$ ) | 2.9148(1) | 2.9148 |

## 7. Eigenvectors of the calculated $^{139}\text{La}$ EFG tensor

**Table S9.** Eigenvectors of the calculated  $^{139}\text{La}$  EFG tensor, expressed in the crystallographic axis, for  $\beta$ -LaOF (APO).

| Axis | $V_{xx}$ | $V_{yy}$ | $V_{zz}$ |
|------|----------|----------|----------|
| a    | 0.01986  | -0.28422 | 0        |
| b    | -0.23621 | -0.15931 | 0        |
| c    | 0        | 0        | 0.04946  |

**Table S10.** Eigenvectors of the calculated  $^{139}\text{La}$  EFG tensor, expressed in the crystallographic axis, for t-LaOF (ES).

| Axis | $V_{xx}$ | $V_{yy}$ | $V_{zz}$ |
|------|----------|----------|----------|
| a    | 0.24227  | -0.03516 | 0        |
| b    | 0.03516  | 0.24227  | 0        |
| c    | 0        | 0        | 0.17154  |

## References

---

- 1 W. H. Zachariasen, *Acta Crystallogr.*, 1951, **4**, 231–236.
- 2 A. K. Tyagi, *J. Mater. Sci. Lett.*, 1995, **14**, 1502–1504.
- 3 J. W. Fergus, *J. Mater. Sci. Lett.*, 1997, **16**, 267–269.
- 4 J. W. Fergus, H.-P. Chen, *J. Electrochem. Soc.*, 2000, **147**, 4696–4704.
- 5 Inorganic Crystal Structure Database (ICSD), Version 1.9.5., FIZ Karlsruhe and NIST, Germany and Maryland, 2007.
- 6 N. C. Baenziger, J. R. Holdeng, G. E. Knudson, A. I. Popov, *J. Am. Chem. Soc.*, 1954, **76**, 4734–4735.
- 7 J. Hölsä, E. Kestilä, *J. Alloys Compd.*, 1995, **225**, 89–94.
- 8 J. Hölsä, E. Säilynoja, H. Rahiala, J. Valkonen, *Polyhedron*, 1997, **19**, 3421–3427.
- 9 T. Petzel, V. Marx, B. Hormann, *J. Alloys Compd.*, 1993, **200**, 27–31.
- 10 S. N. Achary, B. R. Ambekar, M. D. Mathews, A. K. Tyagi, P. N. Moorthy, *Thermochim. Acta*, 1998, **320**, 239–243.
- 11 K. T. Jacob, V. S. Saji, Y. Waseda, *Int. J. Appl. Ceram. Technol.*, 2006, **3**, 312–321.
- 12 T. Grzyb, S. Lis, *Inorg. Chem.*, 2011, **50**, 8112–8120.
- 13 S. E. Dutton, D. Hirai, R. J. Cava, *Mater. Res. Bull.*, 2012, **47**, 714–718.
- 14 T. Grzyb, M. Węclawiak, T. Pędziński, S. Lis, *Opt. Mater.*, 2013, **35**, 2226–2233.
- 15 N. Rakov, J. de A. B. Barbosa, R. B. Guimarães, G. S. Maciel, *J. Alloys Compd.*, 2012, **534**, 32–36.
- 16 J. P. Laval, A. Abaouz, B. Frit, G. Roullet, W. T. A. Harrison, *Eur. J. Solid State Inorg. Chem.*, 1998, **25**, 425–434.
- 17 I. D. Brown, D. Altermatt, *Acta Crystallogr., Sect. B: Struct. Sci.*, 1985, **41**, 244–247.
- 18 N. E. Brese, M. O'Keefe, *Acta Crystallogr., Sect. B: Struct. Sci.*, 1991, **47**, 192–197.
